# Supplementary material
Source: Springer Nature journal article supplement (https://www.springermedizin.de/resource/supplementary/12880_2008_74_MOESM3_ESM.pdf/9450484)

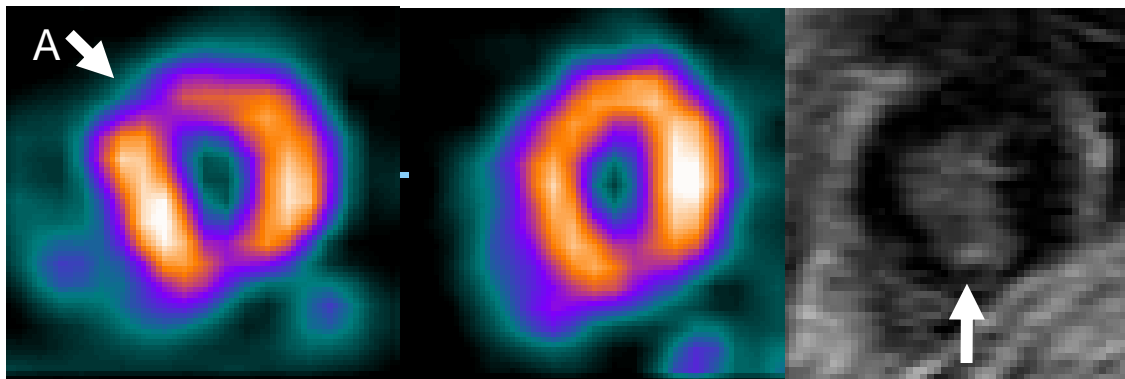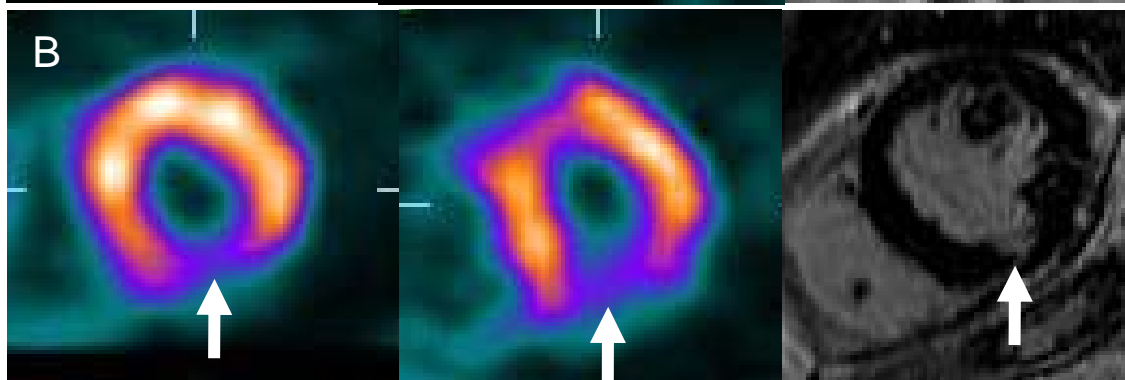

Supplement: MOESM3 [file 9450484]
